# Supplementary material for: Impact of PEGylated Liposomal Doxorubicin and Carboplatin Combination on Glioblastoma
Source: MDPI journal article supplement (doi:10.3390/pharmaceutics14102183), 2022-10-13
Supplement: s1 [file s1]

# Supplementary Materials: Impact of PEGylated Liposomal Doxorubicin and Carboplatin Combination on Glioblastoma

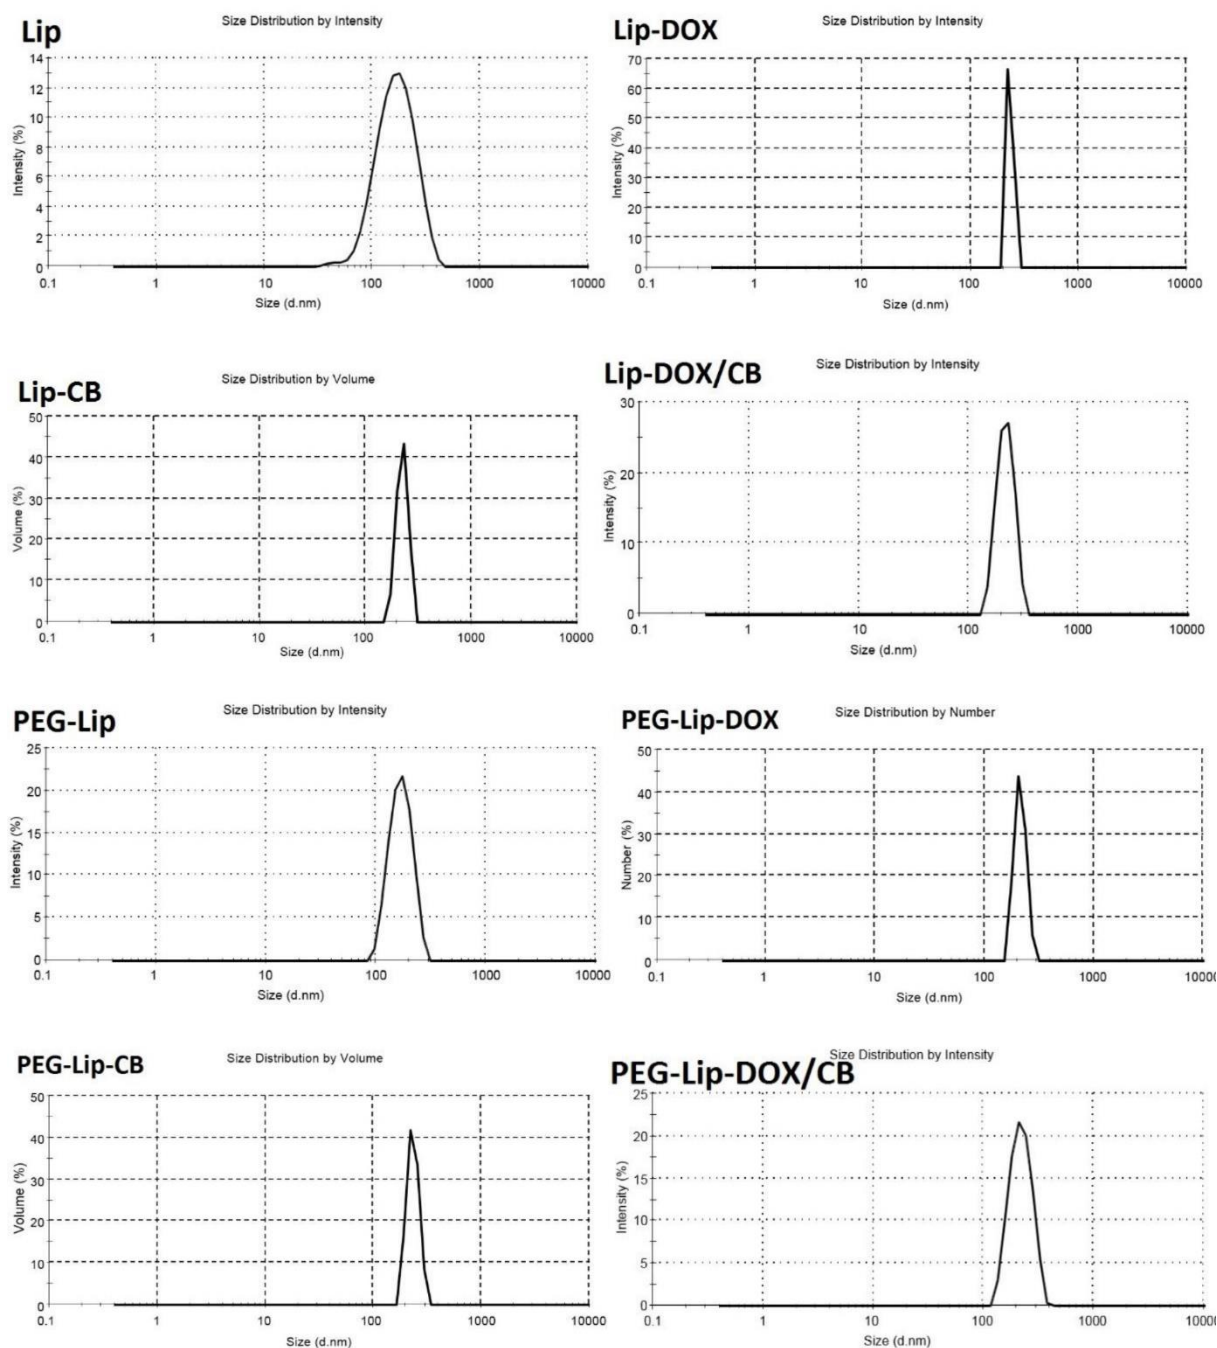

**Figure S1.** Size diagram, polydispersity index (PDI), and zeta potential values of Lip, Lip-DOX, Lip-CB, Lip-DOX/CB, PEG-Lip, PEG-Lip-DOX, PEG-Lip-CB, and PEG-Lip-DOX/CB.

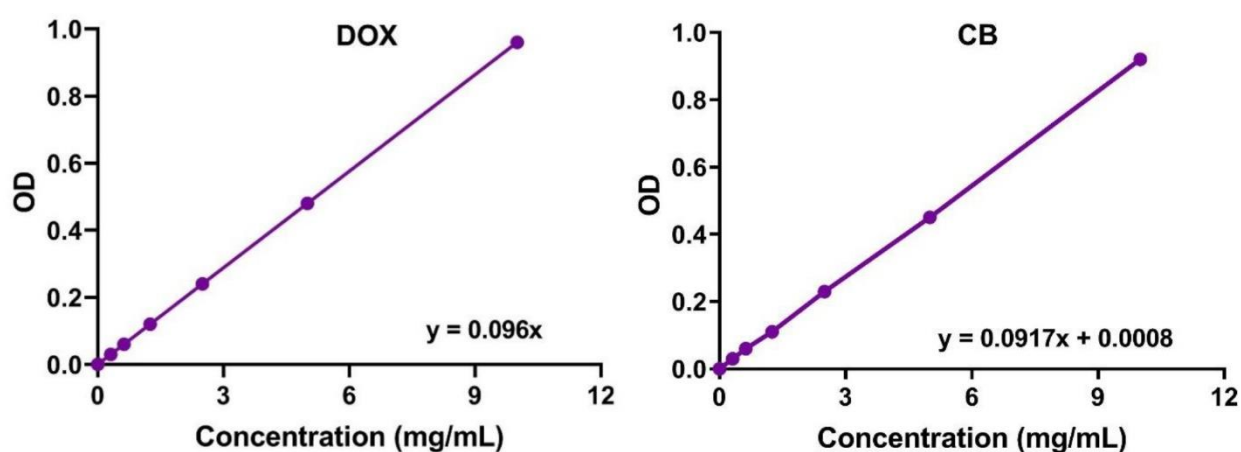

**Figure S2.** The standard curves (drug concentration vs. optical density (OD)) of DOX and CB, respectively.

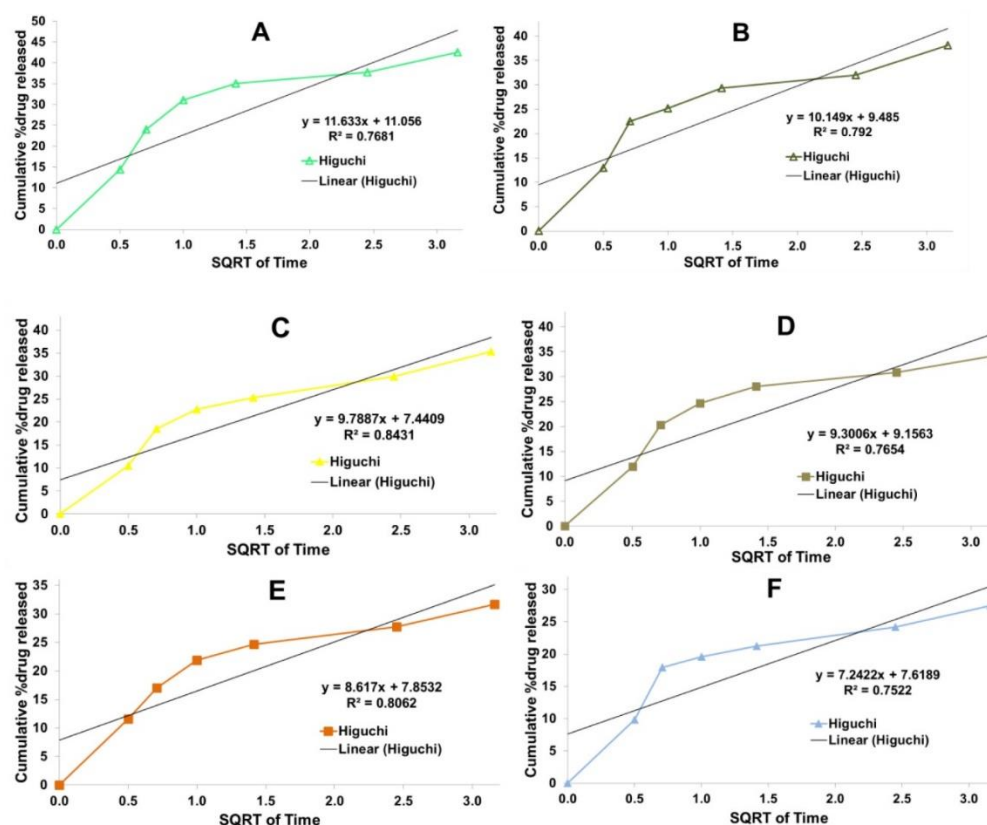

**Figure S3.** The Higuchi model of DOX and CB release from (A) Lip-DOX, (B) Lip-CB, (C) Lip-DOX/CB, (D) PEG-Lip-DOX, (E) PEG-Lip-CB, and (F) PEG-Lip-DOX/CB. Results are expressed as mean  $\pm$  SD of three independent experiments.

**Figure S4.** The stability of Lip-DOX, Lip-CB, Lip-DOX/CB, PEG-Lip-DOX, PEG-Lip-CB, and PEG-Lip-DOX/CB in fetal bovine serum (FBS) over 5 h at 37 °C. Data is expressed as mean  $\pm$  SD (n = 3).

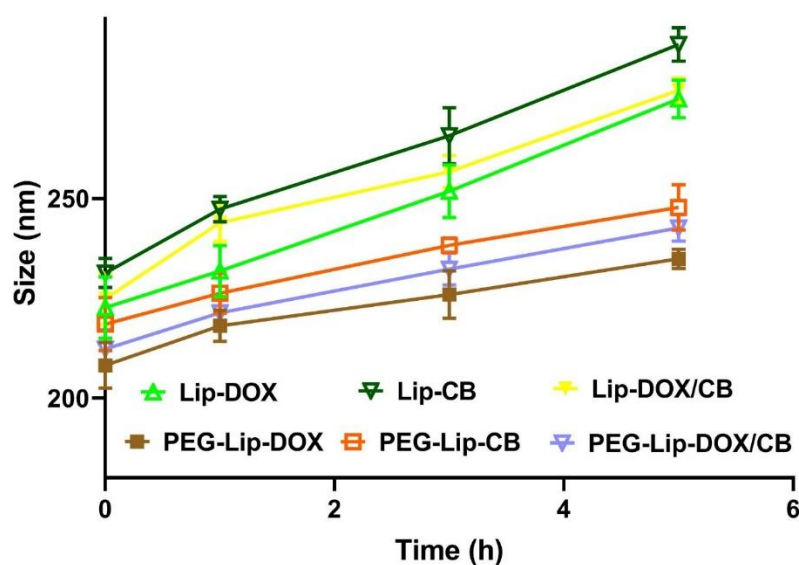

**Figure S4.** The stability of Lip-DOX, Lip-CB, Lip-DOX/CB, PEG-Lip-DOX, PEG-Lip-CB, and PEG-Lip-DOX/CB in fetal bovine serum (FBS) over 5 h at 37 °C. Data is expressed as mean  $\pm$  SD (n = 3).

## Optimization of the doxorubicin, carboplatin-loaded polyethylene glycol (PEG)ylated liposome (PEG-Lip-DOX/CB) formulation

To optimize the preparation of PEG-Lip-DOX/CB, the formulation composition of liposome nanoparticles (Lip) was optimized in terms of size and polydispersity index (PDI) according to the different weight ratios of lecithin and cholesterol (Table S1). The optimized formulation was selected based on the minimum size and PDI [1, 2]. The optimized formulation with the minimum size and PDI values (Table S1, L3) was then optimized against three different concentrations of DSPE-PEG2000 (Table S2). For this purpose, the three concentrations of DSPE-PEG2000 were mixed with L3 separately, and the optimized concentration with the minimum size and PDI was selected to mix with the three different concentrations of the drugs to find the optimized formulation according to their encapsulation efficiency (EE%, Table S3).

**Table S1.** Formulation and optimization of non-PEGylated liposome nanoparticles (Lip) using various lecithin/cholesterol ratios.

| Code                                                                                                                                                                                                                                                                                                   | Lecithin/cholesterol ratio (w/w%) | Size (nm) | PDI |
|--------------------------------------------------------------------------------------------------------------------------------------------------------------------------------------------------------------------------------------------------------------------------------------------------------|-----------------------------------|-----------|-----|
|  <p>Copyright: © 2022 by the authors. Licensee MDPI, Basel, Switzerland. This article is an open access article distributed under the terms and conditions of the Creative Commons Attribution (CC BY) license.</p> |                                   |           |     |

|                                                                                     |         |              |               |
|-------------------------------------------------------------------------------------|---------|--------------|---------------|
| Commons Attribution (CC BY) license (https://creativecommons.org/licenses/by/4.0/). |         |              |               |
| <b>L1</b>                                                                           | 2.7:2   | 259.3 ± 12.8 | 0.337 ± 0.013 |
| <b>L2</b>                                                                           | 2.7:1.5 | 231.1 ± 10.4 | 0.384 ± 0.018 |
| <b>L3</b>                                                                           | 2.7:1   | 195 ± 9      | 0.368 ± 0.016 |
| <b>L4</b>                                                                           | 5.4:2   | 289.4 ± 13.7 | 0.398 ± 0.016 |
| <b>L5</b>                                                                           | 5.4:1.5 | 268.3 ± 11.4 | 0.378 ± 0.018 |
| <b>L6</b>                                                                           | 5.4:1   | 232.3 ± 11.2 | 0.377 ± 0.019 |
| <b>L7</b>                                                                           | 8.1:2   | 346.2 ± 15.9 | 0.463 ± 0.029 |
| <b>L8</b>                                                                           | 8.1:1.5 | 311.8 ± 13.1 | 0.358 ± 0.026 |
| <b>L9</b>                                                                           | 8.1:1   | 282.1 ± 12.2 | 0.351 ± 0.022 |

\* PDI: Polydispersity index.

**Table S2.** Formulation and optimization of PEGylated liposome nanoparticles using various PEG/(lecithin + cholesterol) lipid ratios.

| Code        | DSPE-PEG2000/lipid ratios (w/w%) | Size (nm)   | PDI           |
|-------------|----------------------------------|-------------|---------------|
| <b>L3P1</b> | 0.25/4                           | 219.2 ± 8.7 | 0.382 ± 0.018 |
| <b>L3P2</b> | 0.5/4                            | 204.3 ± 7.7 | 0.361 ± 0.015 |
| <b>L3P3</b> | 1/4                              | 180 ± 8     | 0.323 ± 0.016 |

**Table S3.** Formulation and optimization of drug-loaded PEGylated and non-PEGylated liposome nanoparticles using various DOX/CB concentrations.

| Code          | Drug (w/w%) | Size (nm)    | PDI           | EE%  |
|---------------|-------------|--------------|---------------|------|
| <b>L3C1</b>   | 16.9        | 216.2 ± 9.4  | 0.333 ± 0.018 | 72   |
| <b>L3C2</b>   | 23.3        | 231 ± 11.8   | 0.339 ± 0.017 | 76.1 |
| <b>L3C3</b>   | 28.8        | 225 ± 11     | 0.262 ± 0.01  | 81.3 |
| <b>L3P3C1</b> | 16.9        | 198.2 ± 10.1 | 0.369 ± 0.017 | 73.4 |
| <b>L3P3C2</b> | 23.3        | 215.3 ± 11.4 | 0.249 ± 0.04  | 77.8 |
| <b>L3P3C3</b> | 28.8        | 212 ± 10     | 0.211 ± 0.01  | 83.9 |

\* EE%: Encapsulation efficiency (%).

1. Gkionis, L., Aojula, H., Harris, L. K., & Tirella, A. (2021). Microfluidic-assisted fabrication of phosphatidylcholine-based liposomes for controlled drug delivery of chemotherapeutics. *International journal of pharmaceutics*, 604, 120711.

2. Karthika, C., Sureshkumar, R., Upadhyay, D., Janani, S. K., Vasanthi, C., Raja, M., & Upathyayula, S. S. N. (2019). Formulation Development and In vitro Characterization of Solid Self Nano Emulsifying Drug Delivery System for Curcumin to Target Colon Adenocarcinoma. *Research Journal of Pharmacy and Technology*, 12(7), 3338-3346.

**Table S4.** Measured values of cumulative % drug released, % drug remaining, square root time, log cumulative % drug remaining, log time, log cumulative % drug released, % drug released, cube root of % drug remaining ( $W_t$ ) and  $W_0-W_t$  parameters to determine the drug release kinetics for Lip-DOX.  $W_0$  and  $W_t$  are the initial and remaining amount of drug in the pharmaceutical dosage form at times 0 and t, respectively.

| Time (hr) | cumulative<br>% drug re-<br>leased | % drug re-<br>maining | Square root<br>time | log Cumu %<br>drug re-<br>maining | log time | log Cumu %<br>drug re-<br>leased | % Drug re-<br>leased | Cube Root of<br>% drug Re-<br>maining ( $W_t$ ) | $W_0 - W_t$ |
|-----------|------------------------------------|-----------------------|---------------------|-----------------------------------|----------|----------------------------------|----------------------|-------------------------------------------------|-------------|
| 0         | 0                                  | 100                   | 0.0                 | 2.0                               | 0.0      | 0.0                              | 100                  | 4.6                                             | 0.0         |
| 0.25      | 14.4                               | 85.6                  | 0.5                 | 1.9                               | -0.6     | 1.2                              | 14.4                 | 4.4                                             | 0.2         |
| 0.5       | 24                                 | 76                    | 0.7                 | 1.9                               | -0.3     | 1.4                              | 9.6                  | 4.2                                             | 0.4         |
| 1.0       | 31.1                               | 68.9                  | 1.0                 | 1.8                               | 0.0      | 1.5                              | 7.1                  | 4.1                                             | 0.5         |
| 2         | 35.                                | 65.0                  | 1.4                 | 1.8                               | 0.3      | 1.5                              | 3.9                  | 4.0                                             | 0.6         |
| 6         | 37.7                               | 62.3                  | 2.5                 | 1.8                               | 0.8      | 1.6                              | 2.7                  | 4.0                                             | 0.7         |
| 10        | 42.6                               | 57.4                  | 3.2                 | 1.8                               | 1.0      | 1.6                              | 4.8                  | 3.9                                             | 0.8         |

**Table S5.** Measured values of cumulative % drug released, % drug remaining, square root time, log cumulative % drug remaining, log time, log cumulative % drug released, % drug released, cube root of % drug remaining ( $W_t$ ) and  $W_0-W_t$  parameters to determine the drug release kinetics for Lip-CB.  $W_0$  and  $W_t$  are the initial and remaining amount of drug in the pharmaceutical dosage form at times 0 and  $t$ , respectively.

| Time (hr) | cumulative % drug re-leased | % drug re-remaining | Square root time | log Cumu % drug re-remaining | log time | log Cumu % drug re-leased | % Drug re-leased | Cube Root of % drug Re-remaining ( $W_t$ ) | $W_0-W_t$ |
|-----------|-----------------------------|---------------------|------------------|------------------------------|----------|---------------------------|------------------|--------------------------------------------|-----------|
| 0         | 0                           | 100                 | 0.0              | 2.0                          | 0.0      | 0.0                       | 100              | 4.6                                        | 0.0       |
| 0.25      | 13.0                        | 87.0                | 0.5              | 1.9                          | -0.6     | 1.1                       | 13.0             | 4.4                                        | 0.2       |
| 0.5       | 22.5                        | 77.5                | 0.7              | 1.9                          | -0.3     | 1.4                       | 9.5              | 4.3                                        | 0.4       |
| 1         | 25.2                        | 74.8                | 1.0              | 1.9                          | 0.0      | 1.4                       | 2.7              | 4.2                                        | 0.4       |
| 2         | 29.3                        | 70.7                | 1.4              | 1.8                          | 0.3      | 1.5                       | 4.2              | 4.1                                        | 0.5       |
| 6         | 32                          | 68                  | 2.5              | 1.8                          | 0.8      | 1.5                       | 2.7              | 4.1                                        | 0.6       |
| 10        | 38.1                        | 61.9                | 3.2              | 1.8                          | 1.0      | 1.6                       | 6.1              | 4.0                                        | 0.7       |

**Table S6.** Measured values of cumulative % drug released, % drug remaining, square root time, log cumulative % drug remaining, log time, log cumulative % drug released, % drug released, cube root of % drug remaining ( $W_t$ ) and  $W_0-W_t$  parameters to determine the drug release kinetics for Lip-DOX/CB.  $W_0$  and  $W_t$  are the initial and remaining amount of drug in the pharmaceutical dosage form at times 0 and  $t$ , respectively.

| Time (hr) | cumulative % drug re-leased | % drug re-remaining | Square root time | log Cumu % drug re-remaining | log time | log Cumu % drug re-leased | % Drug re-leased | Cube Root of % drug Re-remaining ( $W_t$ ) | $W_0-W_t$ |
|-----------|-----------------------------|---------------------|------------------|------------------------------|----------|---------------------------|------------------|--------------------------------------------|-----------|
| 0         | 0                           | 100                 | 0.0              | 2.0                          | 0.0      | 0.0                       | 100              | 4.6                                        | 0.0       |
| 0.25      | 10.5                        | 89.5                | 0.5              | 1.9                          | -0.6     | 1.0                       | 10.5             | 4.5                                        | 0.2       |
| 0.5       | 18.6                        | 81.4                | 0.7              | 1.9                          | -0.3     | 1.3                       | 8.0              | 4.3                                        | 0.3       |
| 1         | 22.8                        | 77.2                | 1.0              | 1.9                          | 0.0      | 1.4                       | 4.2              | 4.3                                        | 0.4       |
| 2         | 25.3                        | 74.7                | 1.4              | 1.9                          | 0.3      | 1.4                       | 2.5              | 4.2                                        | 0.4       |
| 6         | 29.9                        | 70.1                | 2.4              | 1.8                          | 0.8      | 1.5                       | 4.6              | 4.1                                        | 0.5       |
| 10        | 35.3                        | 64.7                | 3.2              | 1.8                          | 1.0      | 1.5                       | 5.4              | 4.0                                        | 0.6       |

**Table S7.** Measured values of cumulative % drug released, % drug remaining, square root time, log cumulative % drug remaining, log time, log cumulative % drug released, % drug released, cube root of % drug remaining ( $W_t$ ) and  $W_0-W_t$  parameters to determine the drug release kinetics for PEG-Lip-DOX.  $W_0$  and  $W_t$  are the initial and remaining amount of drug in the pharmaceutical dosage form at times 0 and  $t$ , respectively.

| Time (hr) | cumulative % drug re-leased | % drug re-remaining | Square root time | log Cumu % drug re-remaining | log time | log Cumu % drug re-leased | % Drug re-leased | Cube Root of % drug Re-remaining ( $W_t$ ) | $W_0-W_t$ |
|-----------|-----------------------------|---------------------|------------------|------------------------------|----------|---------------------------|------------------|--------------------------------------------|-----------|
| 0         | 0                           | 100                 | 0.0              | 2.0                          | 0.0      | 0.0                       | 100              | 4.6                                        | 0.0       |
| 0.25      | 11.9                        | 88.1                | 0.5              | 1.9                          | -0.6     | 1.1                       | 11.9             | 4.4                                        | 0.2       |
| 0.5       | 20.3                        | 79.7                | 0.7              | 1.9                          | -0.3     | 1.3                       | 8.4              | 4.3                                        | 0.3       |
| 1         | 24.7                        | 75.3                | 1.0              | 1.9                          | 0.0      | 1.4                       | 4.4              | 4.2                                        | 0.4       |
| 2         | 28.1                        | 71.9                | 1.4              | 1.9                          | 0.3      | 1.4                       | 3.4              | 4.2                                        | 0.5       |
| 6         | 30.9                        | 69.1                | 2.4              | 1.8                          | 0.8      | 1.5                       | 2.8              | 4.1                                        | 0.5       |
| 10        | 34.1                        | 65.9                | 3.2              | 1.8                          | 1.0      | 1.5                       | 3.3              | 4.0                                        | 0.6       |

**Table S8.** Measured values of cumulative % drug released, % drug remaining, square root time, log cumulative % drug remaining, log time, log cumulative % drug released, % drug released, cube root of % drug remaining ( $W_t$ ) and  $W_0-W_t$  parameters to determine the drug release kinetics for PEG-Lip-CB.  $W_0$  and  $W_t$  are the initial and remaining amount of drug in the pharmaceutical dosage form at times 0 and t, respectively.

| Time (hr) | cumulative % drug re-leased | % drug re-remaining | Square root time | log Cumu % drug re-remaining | log time | log Cumu % drug re-leased | % Drug re-leased | Cube Root of % drug Re-remaining ( $W_t$ ) | $W_0-W_t$ |
|-----------|-----------------------------|---------------------|------------------|------------------------------|----------|---------------------------|------------------|--------------------------------------------|-----------|
| 0         | 0                           | 100                 | 0.0              | 2.0                          | 0.0      | 0.0                       | 100              | 4.6                                        | 0.0       |
| 0.25      | 11.6                        | 88.4                | 0.5              | 1.9                          | -0.6     | 1.1                       | 11.6             | 4.5                                        | 0.2       |
| 0.5       | 17                          | 83                  | 0.7              | 1.9                          | -0.3     | 1.2                       | 5.4              | 4.4                                        | 0.3       |
| 1         | 21.9                        | 78.1                | 1.0              | 1.9                          | 0.0      | 1.3                       | 4.9              | 4.3                                        | 0.4       |
| 2         | 24.6                        | 75.4                | 1.4              | 1.9                          | 0.3      | 1.4                       | 2.7              | 4.2                                        | 0.4       |
| 6         | 27.8                        | 72.2                | 2.4              | 1.9                          | 0.8      | 1.4                       | 3.1              | 4.2                                        | 0.5       |
| 10        | 31.7                        | 68.3                | 3.2              | 1.8                          | 1.0      | 1.5                       | 3.9              | 4.1                                        | 0.6       |

**Table S9.** Measured values of cumulative % drug released, % drug remaining, square root time, log cumulative % drug remaining, log time, log cumulative % drug released, % drug released, cube root of % drug remaining ( $W_t$ ) and  $W_0-W_t$  parameters to determine the drug release kinetics for PEG-Lip-DOX/CB.  $W_0$  and  $W_t$  are the initial and remaining amount of drug in the pharmaceutical dosage form at times 0 and t, respectively.

| Time (hr) | cumulative % drug re-leased | % drug re-remaining | Square root time | log Cumu % drug re-remaining | log time | log Cumu % drug re-leased | % Drug re-leased | Cube Root of % drug Re-remaining ( $W_t$ ) | $W_0-W_t$ |
|-----------|-----------------------------|---------------------|------------------|------------------------------|----------|---------------------------|------------------|--------------------------------------------|-----------|
| 0         | 0                           | 100                 | 0.0              | 2.0                          | 0.0      | 0.0                       | 100              | 4.6                                        | 0.0       |
| 0.25      | 9.8                         | 90.2                | 0.5              | 2.0                          | -0.6     | 1.0                       | 9.8              | 4.5                                        | 0.2       |
| 0.5       | 17.9                        | 82.1                | 0.7              | 1.9                          | -0.3     | 1.3                       | 8.1              | 4.3                                        | 0.3       |
| 1         | 19.6                        | 80.4                | 1.0              | 1.9                          | 0.0      | 1.3                       | 1.7              | 4.3                                        | 0.3       |
| 2         | 21.2                        | 78.8                | 1.4              | 1.9                          | 0.3      | 1.3                       | 1.6              | 4.3                                        | 0.4       |
| 6         | 24.2                        | 75.8                | 2.4              | 1.9                          | 0.8      | 1.4                       | 3                | 4.2                                        | 0.4       |
| 10        | 27.5                        | 72.5                | 3.2              | 1.9                          | 1.0      | 1.4                       | 3.3              | 4.2                                        | 0.5       |
